# Supplementary material
Source: PubMed Central journal article supplement (PMC11386854)
Supplement: PBI-18-141-s001.pdf [file PBI-18-141-s001.pdf]

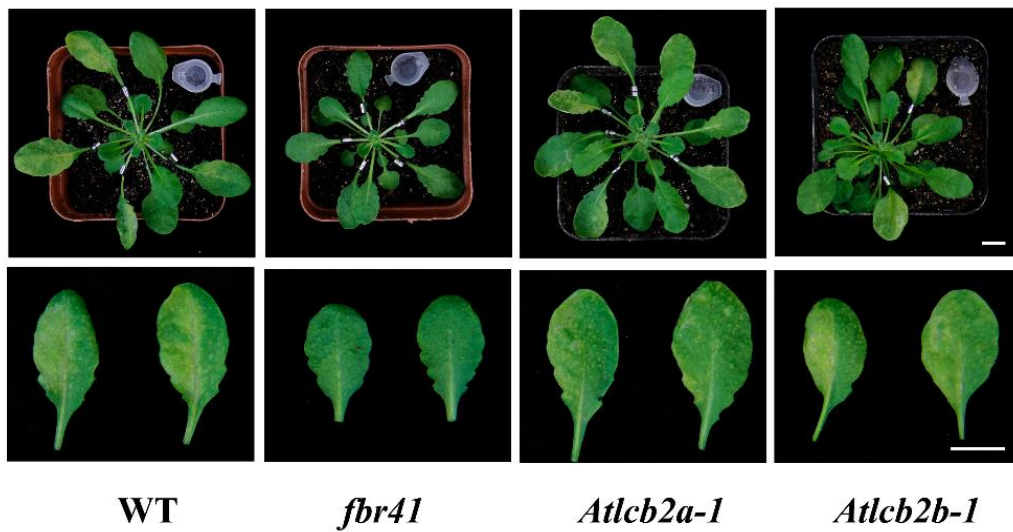

**Figure S1** Lesion formation upon fumonisin B1 (FB1) injection in *fbr41* and null mutants for *AtLCB2a* and *AtLCB2b*.

Six-week-old plants were infiltrated with 10  $\mu$ M FB1 (left side of treated leaves) and 1 % (v/v) methanol as control (right side of treated leaves), then photographed at 3 days post-injection (DPI). Scale bar = 1 cm.

|         |                                                               |     |
|---------|---------------------------------------------------------------|-----|
| FBR41   | MITIPYLTAVSTYFSYGLLFAFGQLRDYSRLIFDWWRTNNLQILDTLRSAWRMRISTSD   | 60  |
| AtLCB2b | MITIPYLTAVSTYFSYGLLFAFGQLRDYSRLIFDWWRTNNLQGYAPICLAHEDFYIRRLY  | 60  |
| AtLCB2a | MITIPYLTAVSTYFSYGLLFAFGQLRDFRRFIDWWFTSNLQGYAPICLGHEDFYIRRLY   | 60  |
| FBR41   | CIIGFRTVLDVPPFQVHMLGLMWLRESLTIITRR-----                       | 94  |
| AtLCB2b | HRIQDCFGRPISAPDAWIDVVERVSDDNNKTLKRTTKTSRCLNLGSYNLGFSGFDEYC    | 120 |
| AtLCB2a | HRIQDCFERPISAPDAWFDVVERYSDNNKTLKRTTKTSRCLNLGSYNLGFSGFDEYC     | 120 |
| FBR41   | -----                                                         |     |
| AtLCB2b | TPRVIESLKKFSASTCSSRVDAGTTSVHAELEDCVAKYVGPAAVIFGMGYATNSAIIIPV  | 180 |
| AtLCB2a | TPRVIESLKKFSASTCSSRVDAGTTSVHAELEECVTRFVGKPAAVVFGMGYATNSAIIIPV | 180 |
| FBR41   | -----                                                         |     |
| AtLCB2b | LIGKGGLIISDSLNHSTIVNGARGSGATIRVFQHNTPGHLEKVLKEQIAEGQPRTHRPWK  | 240 |
| AtLCB2a | LIGKGGLIISDSLNHSSIVNGARGSGATIRVFQHNTPSHLERVLREQIAEGQPRTHRPWK  | 240 |
| FBR41   | -----                                                         |     |
| AtLCB2b | KIIVVVEGIYSMEGEICHLPEIVSICKKYKAYVYLDEAHSIGAIGKTGRGVCELLGVDTS  | 300 |
| AtLCB2a | KIIVVVEGIYSMEGEICHLPEVVAICKKYKAYVYLDEAHSIGAIGKTGKGICELLGVDTA  | 300 |
| FBR41   | -----*                                                        |     |
| AtLCB2b | DVDIMMGTFTKSFGSCGGYIAGSKDLIQYLKHQCPAHLIYATSIPTSAQIISAIKVIILG  | 360 |
| AtLCB2a | DVDVMMGTFTKSFGSCGGYIAGSKELIQYLKHQCPAHLIYATSIPTSAQIISAIKVIILG  | 360 |
| FBR41   | -----                                                         |     |
| AtLCB2b | EDGSNRGAQKLARIRENSNFFRAELQKMGFEVLGDNDSPVMPIMLYNPAKIPAFSRECLR  | 420 |
| AtLCB2a | EDGSNRGAQKLARIRENSNFFRAELQKMGFEVLGDNDSPVMPIMLYNPAKIPAFSRECLR  | 420 |
| FBR41   | -----                                                         |     |
| AtLCB2b | ENLAVVVVGF PATPLLLARARICISASHSREDLIKALQVISKAGDLTGIKYFPAAPKQ   | 480 |
| AtLCB2a | QKVAVVVVGF PATPLLLARARICISASHSREDLIRALKVISKVGDLTSGIKYFPAEPKIE | 480 |
| FBR41   | -----                                                         |     |
| AtLCB2b | VEKNGIKLD                                                     | 489 |
| AtLCB2a | QSKNDIKLD                                                     | 489 |

**Figure S2** Comparison of amino acid sequences of FBR41, AtLCB2b and AtLCB2a. *FBR41* encodes a putative protein with the first 42 amino acids of the annotated 489 amino acids of AtLCB2b plus 52 additional amino acids before premature stop codon. The region in grey background indicates the identical amino acid sequence of FBR41 and AtLCB2b. AtLCB2b and AtLCB2a have conserved pyridoxal 5'-phosphate-binding site (GTFTKSFG) (marked with boxes), and pyridoxal 5'-phosphate-binding lysine residue (marked with asterisk), which are essential for SPT function.

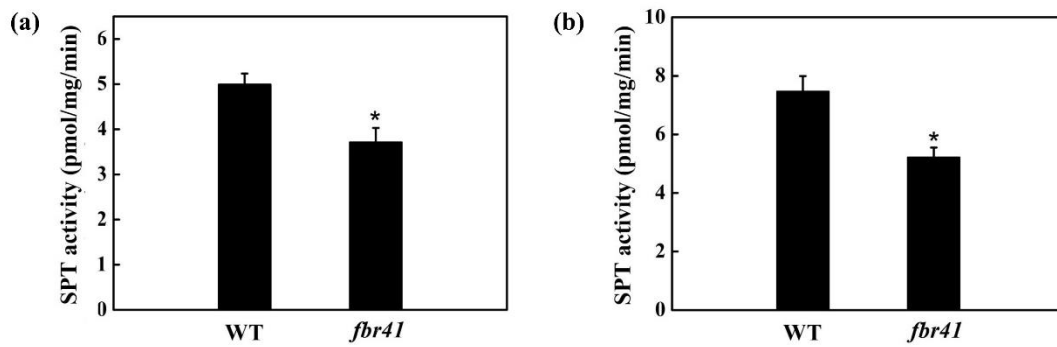

**Figure S3** *In planta* SPT activity in wild-type (WT) and *fbr41* mutant

(a-b) SPT activity of microsomes prepared from untreated (a) or FB1-treated (b) leaves of WT and *fbr41* mutant. In (a), rosette leaves were harvested directly from six-week-old plants for microsomes preparation. In (b), rosette leaves were injected with 10  $\mu$ M FB1 and harvested 6 h after toxin treatment for microsomal isolation. Data shown are means  $\pm$  SD of three biological replicates. Asterisks denote statistically significant differences compared with WT (Student's *t* test, \* $P < 0.05$ )

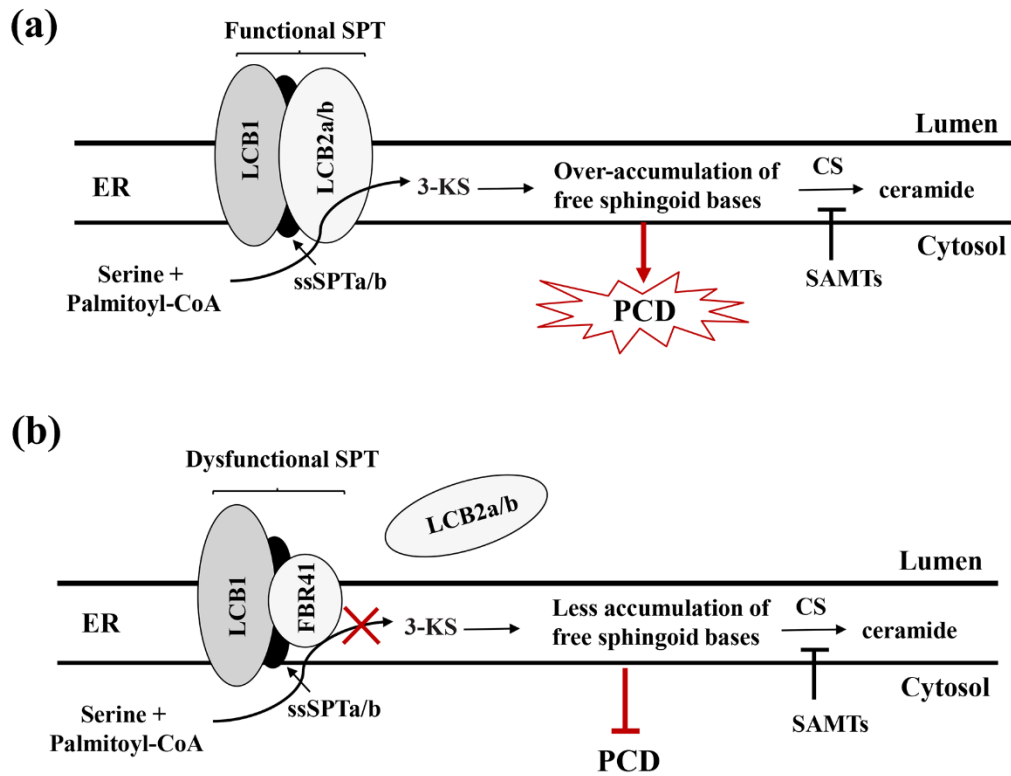

**Figure S4** Proposed model considering the role of FBR41 in the resistance to sphinganine analog mycotoxin (SAMT)-induced cell death.

(a) Upon SAMT stress, free sphingoid bases are over-accumulated, leading to the induction of programmed cell death (PCD). (b) FBR41 competes with functional LCB2 subunit for LCB1 binding, yielding a dysfunctional serine palmitoyltransferase (SPT), thereby attenuating the accumulation of free sphingoid bases and inhibiting the induction of PCD. ER, endoplasmic reticulum; 3-KS, 3-ketosphinganine; CS, ceramide synthase.

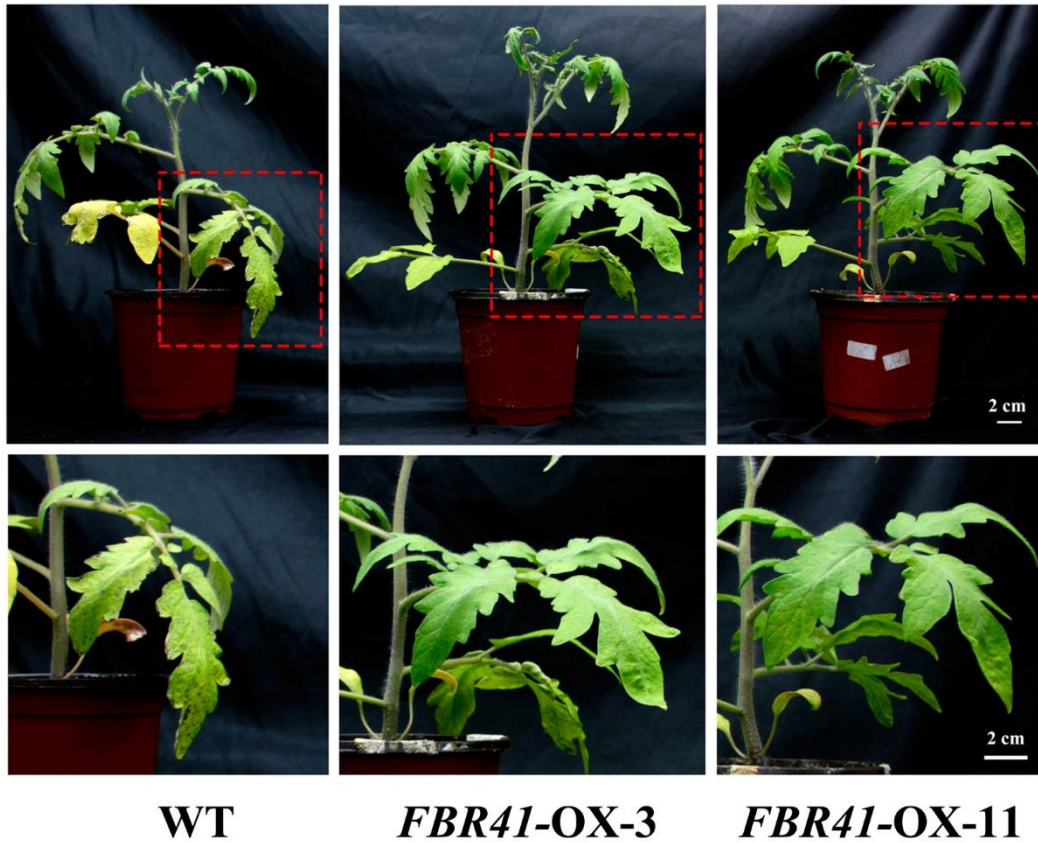

**Figure S5** The disease symptoms of wild-type (WT) and *FBR41*-overexpressing transgenic plants after AAL inoculation.

Five-week-old plants were inoculated with AAL and disease symptoms were photographed at 3 days post inoculation (DPI). Top panel shows the disease symptom of plants and the dashed boxes indicate the representative foliar symptoms. The bottom panel shows the magnified images of foliar symptoms.

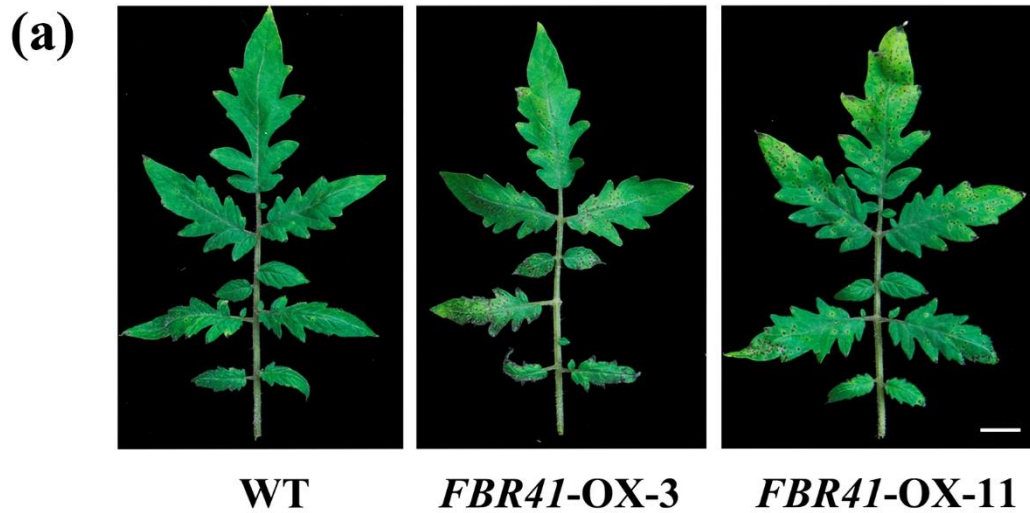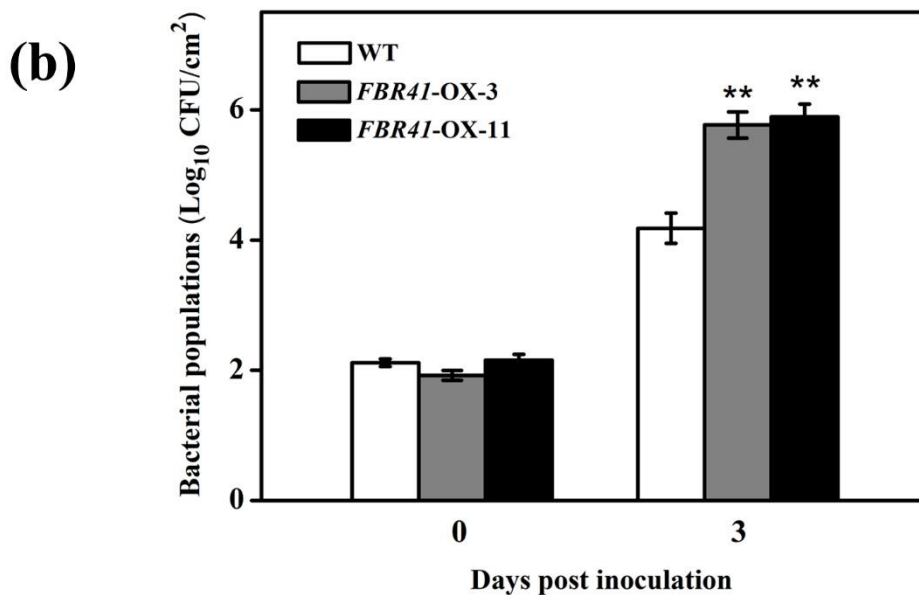

**Figure S6** *FBR41*-overexpressing tomato exhibited decreased resistance against *Pseudomonas syringae* pv. tomato DC 3000 (*Pst* DC3000).

(a) Foliar disease symptom of wild-type (WT) and *FBR41*-overexpressing tomato plants after *Pst* DC3000 infection. Five-week-old plants were inoculated with *Pst* DC3000 and pictures were taken at 3 days post inoculation (DPI). Scale bar =1 cm.

(b) Bacterial population of *Pst* DC3000 in WT and transgenic plants on the day of inoculation (0 DPI) and 3 DPI. Data shown are means  $\pm$  SD of three biological replicates. Asterisks denote statistically significant differences from WT (Student's *t* test, \*\* $P < 0.01$ ).

**Table S1** Fumonisin B1-resistant mutants identified by forward genetic screening in *Arabidopsis*

| Mutant         | Location of mutation site                                                    | Phenotypes                                                                                                         | Mutagenesis     | Dominant/Recessive | Reference                    |
|----------------|------------------------------------------------------------------------------|--------------------------------------------------------------------------------------------------------------------|-----------------|--------------------|------------------------------|
| <i>fbr1</i>    | Lower arm of chromosome I                                                    | FB1-resistant, no morphological alterations                                                                        | EMS-mutagenesis | Recessive          | (Stone <i>et al.</i> , 2000) |
| <i>fbr2</i>    | Upper arm of chromosome V                                                    | FB1-resistant, no morphological alterations                                                                        | EMS-mutagenesis | Recessive          | (Stone <i>et al.</i> , 2000) |
| <i>fbr6</i>    | <i>SQUAMOSA promoter binding protein-like 14</i><br>( <i>At1g20980</i> )     | FB1-resistant, enhanced leaf margin serration and elongated petioles                                               | T-DNA insertion | Recessive          | (Stone <i>et al.</i> , 2005) |
| <i>fbr11-1</i> | <i>Long chain base 1</i><br>( <i>At4g36480</i> )                             | FB1-resistant, no morphological alterations                                                                        | T-DNA insertion | Recessive          | (Shi <i>et al.</i> , 2007)   |
| <i>fbr12</i>   | <i>Eukaryotic translation initiation factor 5A-2</i><br>( <i>At1g26630</i> ) | FB1-resistant, antiapoptotic, reduced dark-induced leaf senescence, severe defects in plant growth and development | T-DNA insertion | Recessive          | (Feng <i>et al.</i> , 2007)  |
| <i>fbr136</i>  | Chromosome III                                                               | FB1-resistant, no morphological alterations                                                                        | EMS-mutagenesis | Recessive          | (Sun & Zuo, 2008)            |

EMS: ethyl methanesulfonate

**Table S2** List of SSLP markers used for first-pass mapping

| <b>Maker</b> | <b>Chromosome</b> | <b>Forward primer (5'-3')</b> | <b>Reserve primer (5'-3')</b> |
|--------------|-------------------|-------------------------------|-------------------------------|
| NGA 63       | Chr1              | AACCAAGGCACAGAAGCG            | ACCCAAGTGATCGCCACC            |
| NGA392       | Chr1              | TTGAATAATTTGTAGCCATG          | GGTGTTAAATGCGGTGTTT           |
| NGA392       | Chr1              | GTCGTCTATGATGGGAAATAC         | ATGCTAAAAGGGTCATAAGGGC        |
| NGA280       | Chr1              | CTGATCTCACGGACAATAGTGC        | GGCTCCATAAAAAGTGCACC          |
| T8K14        | Chr1              | GGACAAGAACCTCATACCTTGC        | CCCCATTCACCCACTCTTGACTC       |
| T12J2        | Chr2              | TGAACCCTTATAATATGGCTGGC       | GGTAAGCAAGGAAAGGAACAATTC      |
| NGA1126      | Chr2              | GGTAAGCAAGGAAAGGAACAATTC      | CGCTACGCTTTTCGGTAAAG          |
| NGA168       | Chr2              | TCGTCTACTGCACTGCCG            | GAGGACATGTATAGGAGCCTCG        |
| T30B22       | Chr2              | TGGCCATTCACTTGATCGCCATG       | CTGACATCCAGTTTGGTAACTAC       |
| NGA162       | Chr3              | CATGCAATTTGCATCTGAGG          | CTCTGTCACTCTTTTCTCTGG         |
| MMJ24        | Chr3              | AAAACAGGAAGCAAGAAAATGAG       | TCGAACATAAGTGAGAAATAGATG      |
| T24C20       | Chr3              | GCACACATTTGTTATGTTAT          | TAGCCGAACCGCACCTTT            |
| T18N16       | Chr3              | GAGTAAAGTTTGCCTTGTAT          | GTTCTCCGAGTTGATTCTA           |
| NGA6         | Chr3              | TGGATTTCTTCTCTCTCAC           | ATGGAGAAGCTTACACTGATC         |
| T15B16       | Chr4              | CAAATTTCACTGATTCATCGC         | TGATTGTTCGATTTTGTAGTTG        |
| F24G24       | Chr4              | AAAACACTGACTTAATGGGTTAGCC     | GAAGTAGAGGGAACAATCGGATGC      |
| F1N20        | Chr4              | ATATGGTAGGCATTGTTGACATG       | CACATCATAGTTAACTTGCCTTTC      |
| NGA1107      | Chr4              | GCGAAAAAACAAAAAATCCA          | CGACGAATCGACAGAATTAGG         |
| NGA225       | Chr5              | GAAATCCAAATCCCAGAGAGG         | TCTCCCCACTAGTTTGTGTCC         |
| NGA106       | Chr5              | GTTATGGAGTTTCTAGGGCAGC        | TGCCCATTTTGTCTTCTC            |
| NGA76        | Chr5              | GGAGAAAATGTCACTCTCCACC        | AGGCATGGGAGACATTTACG          |
| K3K3IND      | Chr5              | TGGTTCAGATCATGATCAAGTAG       | CGACGAGTGATGGGGTTACAAAAG      |
| MXC20        | Chr5              | CAGTGTAGCAGAAAAGGATTAAC       | GGGTTAAGAGAAATGATAGAGATG      |

**Table S3** List of CAPS markers used for fine mapping

| <b>Marker</b> | <b>Chromosome</b> | <b>Forward primer (5'-3')</b> | <b>Reverse primer (5'-3')</b> |
|---------------|-------------------|-------------------------------|-------------------------------|
| CAPS18005     | Chr3              | GATTCGGTCTGAACACAAAG          | GTCTTGATGCTTCCATGC            |
| CAPS18066     | Chr3              | ATCAGTAATCACATAAGTGG          | TGCAAAGTCCTCAATGGC            |
| CAPS18170     | Chr3              | GGAATAGAGCATAAGCAGTTAAGAG     | GTGTGGATACAACGTCCCAGAACGAC    |
| CAPS18175     | Chr3              | GCCAAAGTATCTACTTAAGAAAGC      | GTAGCAATTGACATACCCAATC        |
| CAPS18254     | Chr3              | ATCTCAGATACCAAGCCAGA          | GCAAGGATCTTACCAACAT           |
| CAPS18711     | Chr3              | CACATGCGCTTAGC                | CTTGCCATAAGGAC                |



**Table S4** Primers used in this study

| Primer name            | sequence (5'-3')                         | Experiments              |
|------------------------|------------------------------------------|--------------------------|
| 48780-genomic-F        | CTTCTCGCGTACCGCAAACGCAG                  | Amplifying At3g48780     |
| 48780-genomic-R        | GTCAGGAAACAAAAGGGAAGAGTTTG               | genomic DNA              |
| 48780-cDNA-F           | AATACACATAACATTCCCTAATAAG                | Amplifying At3g48780     |
| 48780-cDNA-R           | CGAAAAAGATTTTAATCCCTTTATA                | cDNA                     |
| FBR41-CDS-F            | ATGATTACGATCCCATAACCTTA                  | Generating 35S::FBR41-   |
| FBR41-CDS-R            | ACGTCTTGTTGTTATCGTCAGA                   | myc                      |
| AtLCB1-Nluc (Kpn I)-F  | <u>GG</u> ggtaccATGGCTTCGAATCTCGTG       | Generating AtLCB1-       |
| AtLCB1-Nluc (Sal I)-F  | <u>ACGC</u> gtcgacGGACTTGAGTAGAAGCTCTGA  | Nluc                     |
| AtLCB1-Cluc-(Kpn I)-F  | <u>GG</u> ggtaccATGGCTTCGAATCTCGTG       | Generating AtLCB1-       |
| AtLCB1-Cluc-(Sal I)-R  | <u>ACGC</u> gtcgacTCAGGACTTGAGTAGAAGCTCT | Cluc                     |
| AtLCB2a-Nluc-(Kpn I)-F | <u>GG</u> ggtaccATGATAACGATTCCTTATTTAACC | Generating AtLCB2a-      |
| AtLCB2a-Nluc-(Sal I)-R | <u>ACGC</u> gtcgacATCCAGCTTGATGTCGTTTTTC | Nluc                     |
| FBR41-Cluc-(Kpn I)-F   | <u>GG</u> ggtaccATGATTACGATCCCATAACCT    | Generating FBR41-Cluc    |
| FBR41-Cluc-(Sal I)-R   | <u>ACGC</u> gtcgacTTAACGTCTTGTTGTTATCG   |                          |
| FBR41-F                | ATGATTACGATCCCA                          | Identification of        |
| MYC-R                  | CACCGTTCAAATCTTCTTC                      | transgenic plants        |
| At3g48780-qPCR-F       | TTTGCGAGAAAACCTTGGCGG                    | Gene expression analysis |
| At3g48780-qPCR-R       | CCGGTAAGGTCACCTGCTTT                     |                          |
| FBR41-qPCR-F           | TGCTTTTCGCGTTTGGTCAG                     | Gene expression analysis |
| FBR41-qPCR-R           | CCAAGCAGATCGGAGCGTAT                     |                          |
| AtACTIN7-qPCR-F        | CCATTCAGGCCGTTCTTTC                      | Internal control         |
| AtACTIN7-qPCR-R        | CGTTCTGCGGTAGTGGTGA                      |                          |
| SlACTIN7-qPCR-F        | TGGTCGGAATGGGACAGAAG                     | Internal control         |
| SlACTIN7-qPCR-R        | CTCAGTCAGGAGAACAGGGT                     |                          |
| DeH-F                  | CTCCGCCTGCCAATGTGATTAC                   | Estimation of AAL        |
| E8T7                   | GCGTACCAAGGCACGTGCTCAA                   | biomass                  |

### **Methods S1** Screening of the fumonisin B1-resistant mutant.

M2 seeds from ethyl methanesulfonate (EMS)-generated mutant population were sown on half-strength MS medium containing 1% (w/v) sucrose and 0.7% (w/v) agar with 1  $\mu$ M FB1 for 21 d. The seedlings which can survive were transferred to half-strength MS medium without FB1 and allowed to self-fertilized to produce M3 seeds. M3 seeds were subjected to 1  $\mu$ M FB1 to confirm FB1-resistant phenotype. Prior to phenotypic analysis, the mutant was backcrossed to wild-type Col-0 three times.

### **Methods S2** tomato transformation

Cotyledons excised from tomato seedlings (7-10 days old, grown under sterile condition) were incubated for 15 min in a suspension of *Agrobacterium tumefaciens* LBA4404 in MS salts containing 3 % sucrose. The infected cotyledons were transferred to shoot-inducing medium containing MS, 3 % sucrose (w/v), 0.8 % (w/v) agar, 1 mg L<sup>-1</sup> IAA and 1.75 mg L<sup>-1</sup> zeatin. After 2 days co-cultivation, explants were transferred to the same medium supplemented with 75 mg L<sup>-1</sup> kanamycin and 200 mg L<sup>-1</sup> timentin and cultivated until the production of callus. Explants were subcultured onto shoot-inducing medium with 50 mg L<sup>-1</sup> kanamycin and 200 mg L<sup>-1</sup> timentin. Finally, induced shoots were rooted on root-inducing medium containing MS, 3 % sucrose (w/v), 0.8 % (w/v) agar, 50 mg L<sup>-1</sup> kanamycin and 200 mg L<sup>-1</sup> timentin. Shoots that rooted in the presence of kanamycin were transferred to soil.

### **Methods S3** *Pseudomonas syringae* pv tomato DC3000 infection assays

Inoculation of *Pst* DC3000 was carried out as previously described (Li *et al.*, 2014). In brief, bacterial was cultured overnight in king's B liquid medium containing 25  $\mu$ g/ml rifampicin, and then collected and resuspended in infiltration buffer (10 mM MgCl<sub>2</sub>, 0.04 % Silwet L-77) to OD<sub>600</sub> = 0.0002. Five-week-old tomato plants were vacuum infiltrated with bacterial suspension or infiltration buffer (Mock) and kept in the growth chamber with high humidity. Disease symptoms were observed daily, and the *in planta* growth of bacterial was measured according to Li *et al.* (2014).

## Methods S4 Microsome preparation and SPT assay

Isolation of microsomes from *Arabidopsis* leaves were performed as previously described (Chen *et al.*, 2006, Lynch and Fairfield, 1993) and the protein concentration were determined using Bradford method (Beyotime, Haimen, China) following the manufacturer's protocols. SPT assay was performed as previously described (Han *et al.*, 2002).

## References

- Chen, M., Han, G., Dietrich, C.R., Dunn, T.M. and Cahoon, E.B. (2006) The essential nature of sphingolipids in plants as revealed by the functional identification and characterization of the *Arabidopsis* LCB1 subunit of serine palmitoyltransferase. *Plant Cell* **18**, 3576-3593.
- Feng, H., Chen, Q., Feng, J., Zhang, J., Yang, X. and Zuo, J. (2007) Functional characterization of the *Arabidopsis* eukaryotic translation initiation factor 5A-2 that plays a crucial role in plant growth and development by regulating cell division, cell growth, and cell death. *Plant Physiol.* **144**, 1531-1545.
- Han, G., Gable, K., Kohlwein, S.D., Beaudoin, F., Napier, J.A. and Dunn, T.M. (2002) The *Saccharomyces cerevisiae* YBR159w gene encodes the 3-ketoreductase of the microsomal fatty acid elongase. *J Biol Chem.* **277**, 35440-35449.
- Lynch, D.V. and Fairfield, S.R. (1993) Sphingolipid long-chain base synthesis in plants (characterization of serine palmitoyltransferase activity in squash fruit microsomes). *Plant Physiol.* **103**, 1421-1429.
- Shi, L., Bielawski, J., Mu, J., Dong, H., Teng, C., Zhang, J., Yang, X. *et al.* (2007) Involvement of sphingoid bases in mediating reactive oxygen intermediate production and programmed cell death in *Arabidopsis*. *Cell Res.* **17**, 1030-1040.
- Stone, J.M., Heard, J.E., Asai, T. and Ausubel, F.M. (2000) Simulation of fungal-mediated cell death by fumonisin B1 and selection of fumonisin B1-resistant (*fbr*) *Arabidopsis* mutants. *Plant Cell* **12**, 1811-1822.
- Stone, J.M., Liang, X., Nekl, E.R. and Stiers, J.J. (2005) *Arabidopsis* AtSPL14, a plant-specific SBP-domain transcription factor, participates in plant development and sensitivity to fumonisin B1. *Plant J.* **41**, 744-754.
- Sun, S. and Zuo, J. (2008) Identification and characterization of the *Arabidopsis* fumonisin B1 resistant *fbr136*. *Prog. Biochem. Biophys.* **35**, 283-289.
